# Supplementary material for: Foxc1 and Foxc2 in the Neural Crest Are Required for Ocular Anterior Segment Development
Source: PubMed Central journal article supplement (PMC5361455; doi:10.1167/iovs.16-21217), 2017-03
Supplement: iovs-58-02-52_s01.pdf [file iovs-58-02-52_s01.pdf]

# Supplemental Figure 1

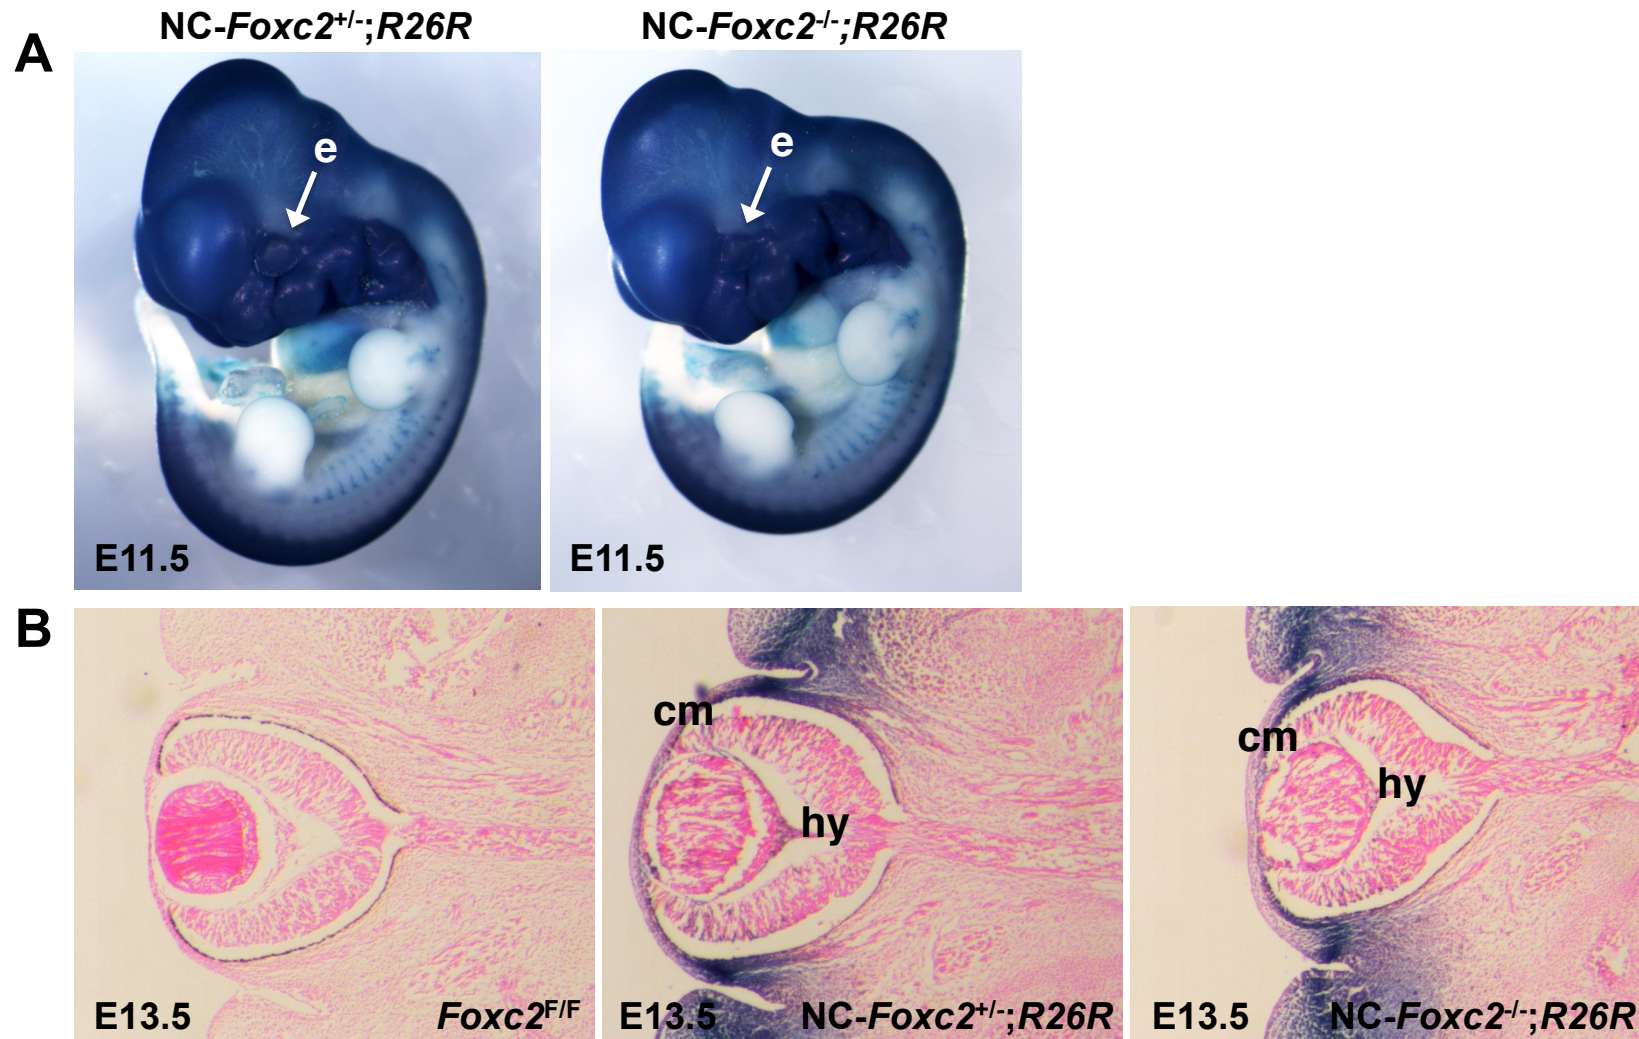

**Supplemental Figure 1. NC-specific deletion of *Foxc2* does not alter NC cell migration to the developing eye.** Male NC-*Foxc2*<sup>+/-</sup> mice were bred with female *Foxc2*<sup>F/F</sup>;*R26R* mice carrying a ROSA26-conditional LacZ reporter allele (*Rosa26*) to generate NC-*Foxc2*<sup>+/-</sup>;*R26R* and NC-*Foxc2*<sup>-/-</sup>;*R26R* embryos. The embryos were subject to X-gal staining to detect NC-derived cells. (A) NC-derived cells were identified in the craniofacial region, the eye (e), the outflow tract of the heart, and the trunk of E11.5 NC-*Foxc1*<sup>+/-</sup> and NC-*Foxc1*<sup>-/-</sup> embryos. (B) Within the eyes of E13.5 embryos, NC-derived cells were identified in the corneal mesenchyme (cm) and hyaloid vessels (hy). The results presented in (A) and (B) were consistent with the migration of NC-derived cells in wild-type animals.
