# Supplementary material for: Foxc1 and Foxc2 in the Neural Crest Are Required for Ocular Anterior Segment Development
Source: PubMed Central journal article supplement (PMC5361455; doi:10.1167/iovs.16-21217), 2017-03
Supplement: iovs-58-02-52_s02.pdf [file iovs-58-02-52_s02.pdf]

Supplemental Figure 2

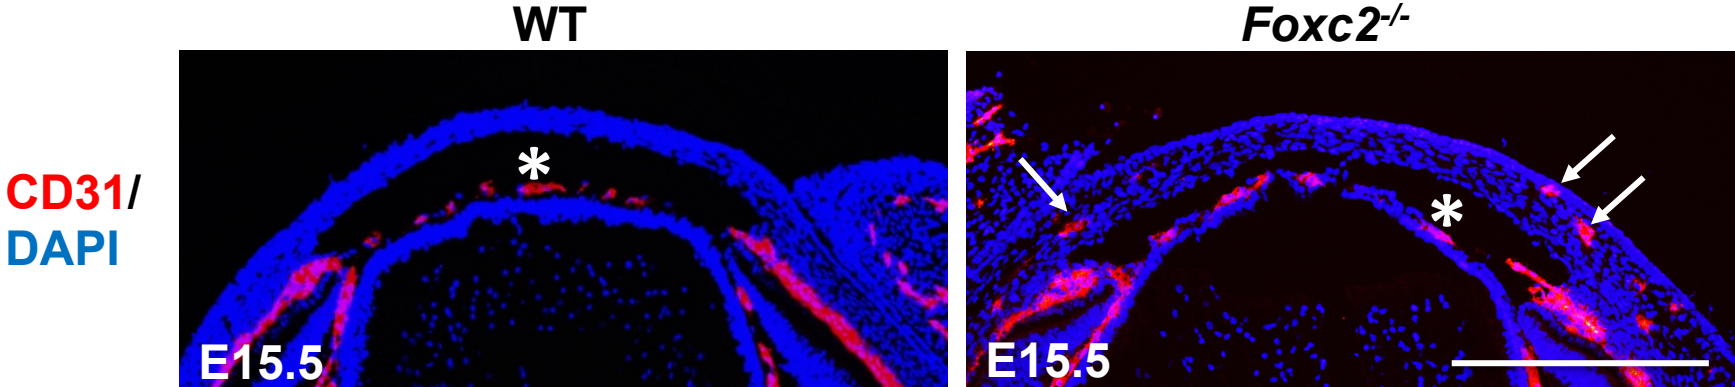

**Supplemental Figure 2. Abnormal vessel formation in the cornea of global *Foxc2*<sup>-/-</sup> mice at E15.5.** Immunohistochemistry was performed to detect CD31<sup>+</sup> vascular endothelial cells. Global *Foxc2*<sup>-/-</sup> mutant embryos exhibited abnormal blood vessel formation (arrows) in the peripheral corneal stroma, while they developed the anterior chamber (asterisk) compared to wild-type (WT) embryos. Nuclei were counterstained with DAPI. Scale bar, 100 μm
