# Supplementary material for: Foxc1 and Foxc2 in the Neural Crest Are Required for Ocular Anterior Segment Development
Source: PubMed Central journal article supplement (PMC5361455; doi:10.1167/iovs.16-21217), 2017-03
Supplement: iovs-58-02-52_s03.pdf [file iovs-58-02-52_s03.pdf]

# Supplemental Figure 3

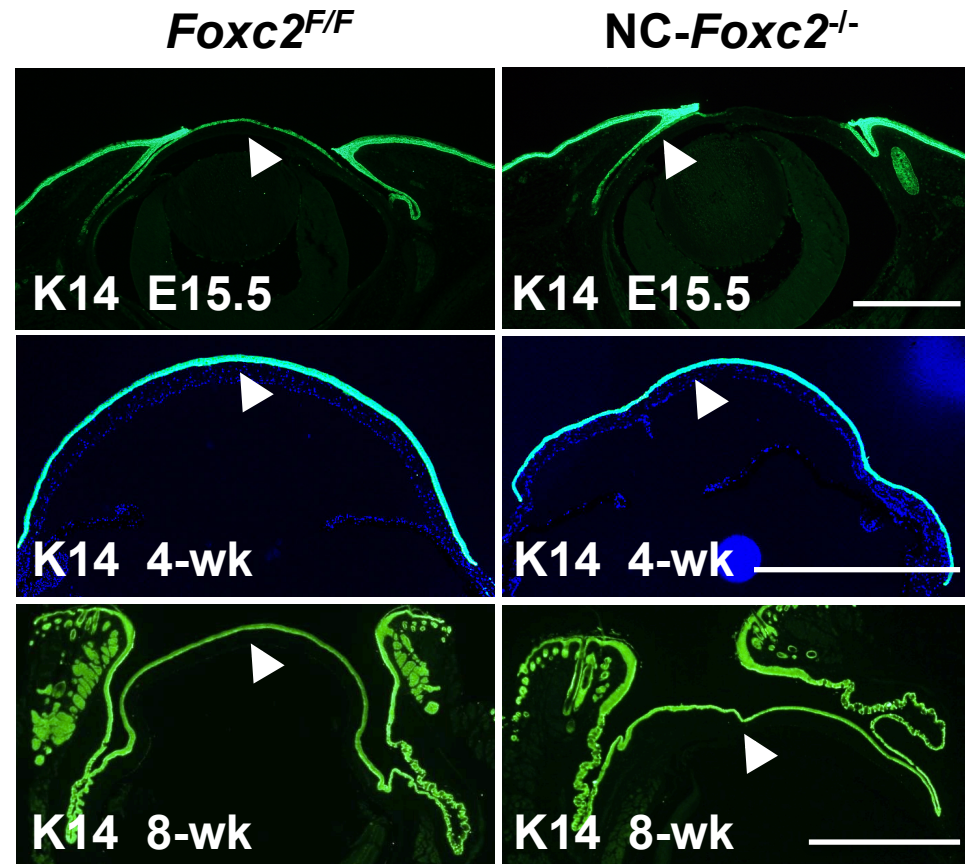

**Supplemental Figure 3. Expression of K14 in *Foxc2*<sup>F/F</sup> and NC-*Foxc2*<sup>-/-</sup> mice.** K14 expression in both *Foxc2*<sup>F/F</sup> and NC-*Foxc2*<sup>-/-</sup> mice was not altered in the ocular epithelium including the corneal epithelium (arrowheads). Scale bars, 200  $\mu$ m.
