# Supplementary material for: Foxc1 and Foxc2 in the Neural Crest Are Required for Ocular Anterior Segment Development
Source: PubMed Central journal article supplement (PMC5361455; doi:10.1167/iovs.16-21217), 2017-03
Supplement: iovs-58-02-52_s04.pdf [file iovs-58-02-52_s04.pdf]

# Supplemental Figure 4

*Foxc2*<sup>F/F</sup>

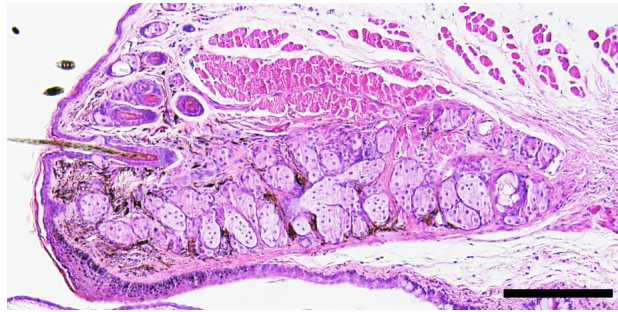

NC-*Foxc2*<sup>-/-</sup>

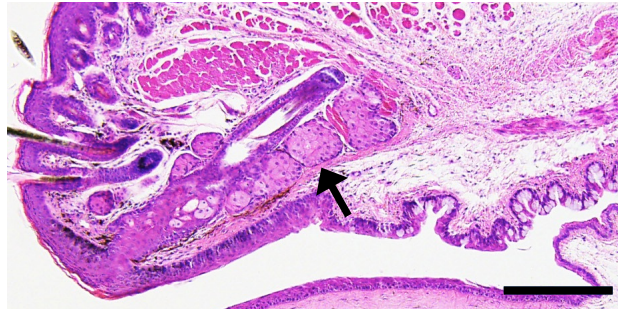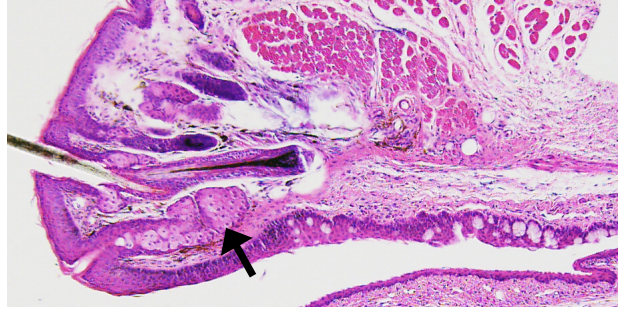

**Supplemental Figure 4. Adult NC-*Foxc2*<sup>-/-</sup> mice display hypoplasia of the meibomian glands.**

Arrows indicate hypoplastic meibomian glands in NC-*Foxc2*<sup>-/-</sup> mice. Scale bars, 100  $\mu$ m.
