# Supplementary material for: Foxc1 and Foxc2 in the Neural Crest Are Required for Ocular Anterior Segment Development
Source: PubMed Central journal article supplement (PMC5361455; doi:10.1167/iovs.16-21217), 2017-03
Supplement: iovs-58-02-52_s05.pdf [file iovs-58-02-52_s05.pdf]

## Supplemental Figure 5

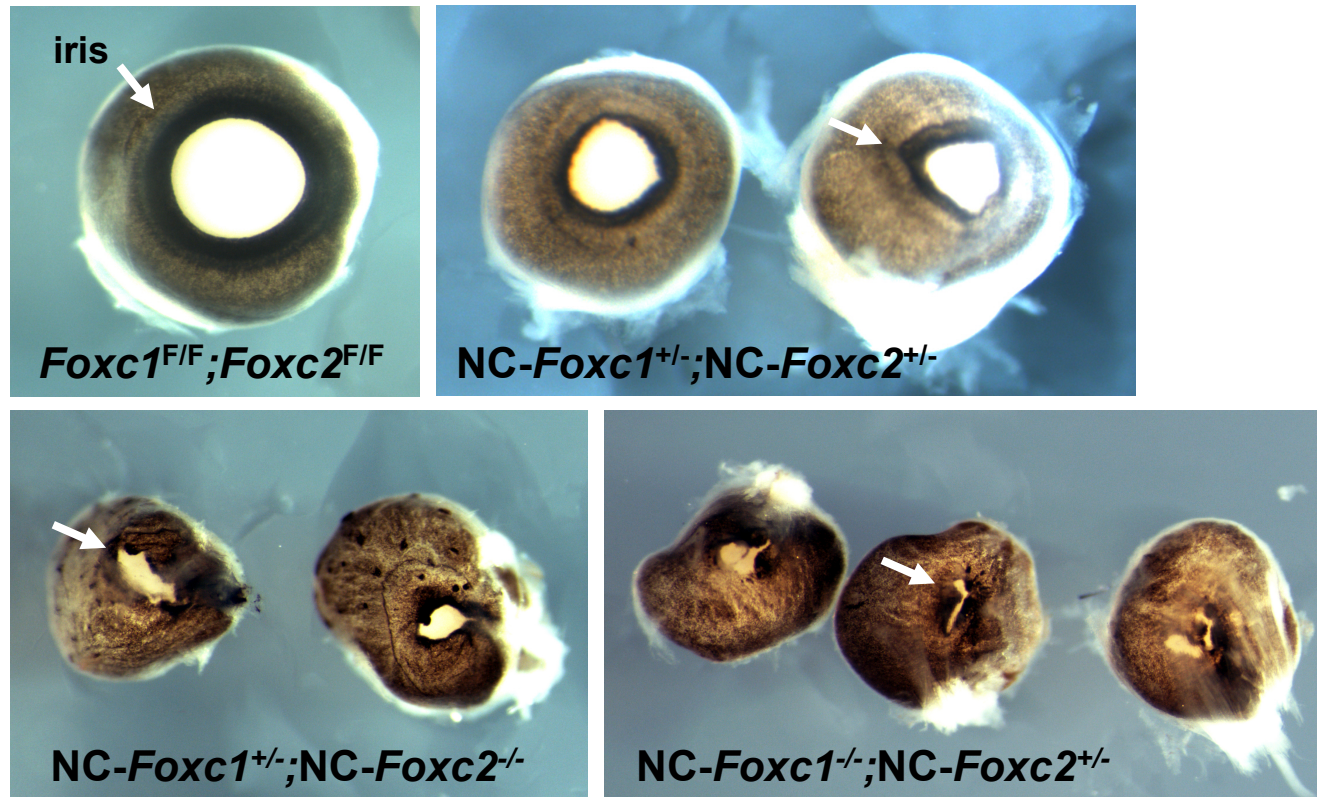

**Supplemental Figure 5. The eyeballs of *Foxc1<sup>F/F</sup>*; *Foxc2<sup>F/F</sup>*, NC-*Foxc1<sup>+/-</sup>*;NC-*Foxc2<sup>+/-</sup>*, NC-*Foxc1<sup>+/-</sup>*;NC-*Foxc2<sup>-/-</sup>*, NC-*Foxc1<sup>-/-</sup>*;NC-*Foxc2<sup>+/-</sup>* mice at P0. Compound NC-*Foxc1<sup>+/-</sup>*;NC-*Foxc2<sup>+/-</sup>* mice had irregular iris. Compound NC-*Foxc1<sup>+/-</sup>*;NC-*Foxc2<sup>-/-</sup>* and compound NC-*Foxc1<sup>-/-</sup>*;NC-*Foxc2<sup>+/-</sup>* mice had smaller eyes, disrupted iris and irregular narrow notched pupil shape (arrows).**
